# Supplementary material for: Differing molecular response of young and advanced maternal age human oocytes to IVM
Source: Oxford University Press journal article supplement (doi:10.1093/humrep/dex284), 2017-08-22
Supplement: dex284suppl_figure2.pdf [file dex284suppl_figure2.pdf]

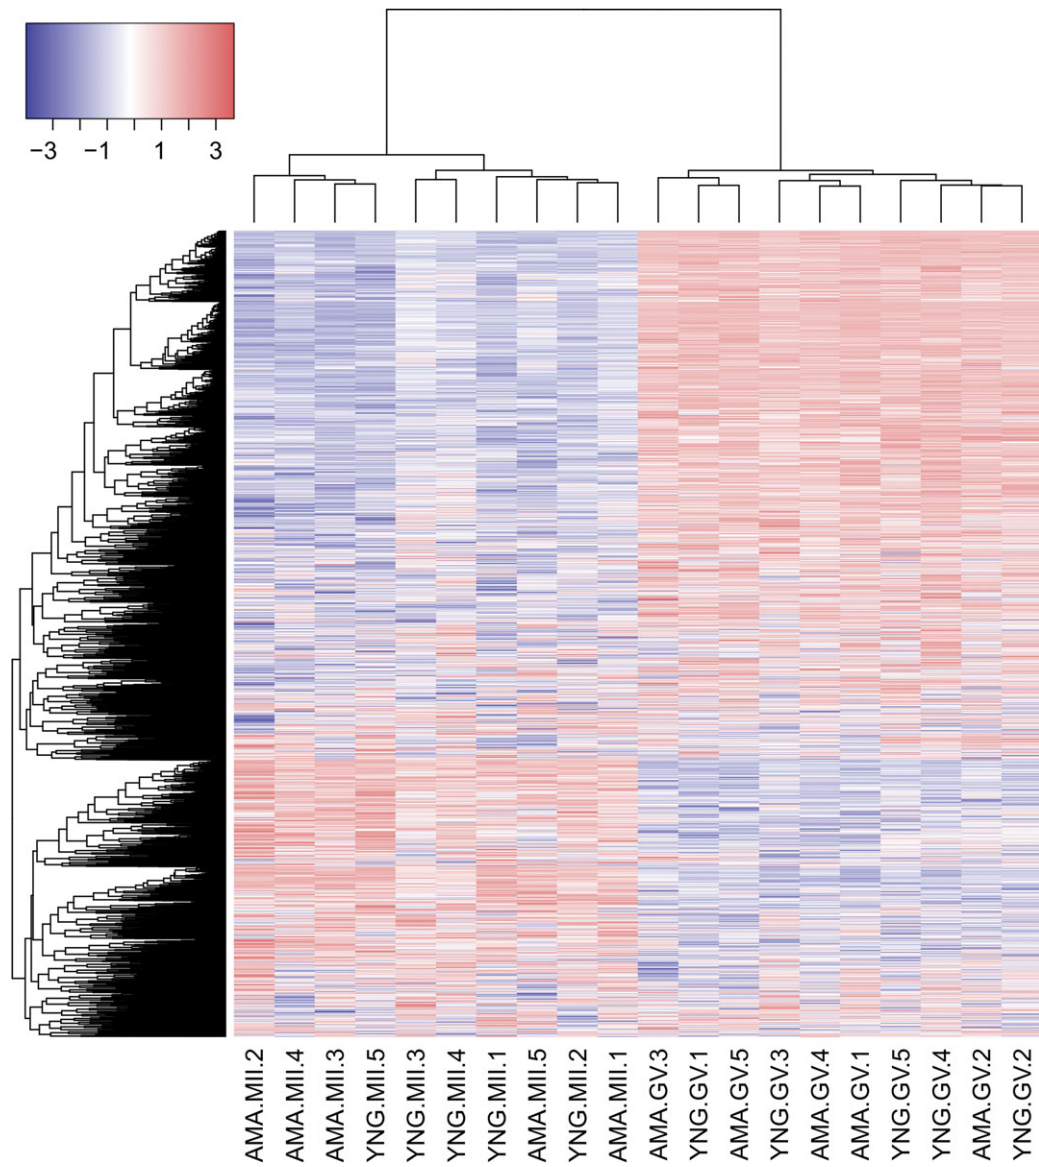

**Supplementary Figure S2** Hierarchical clustering and heatmap of all expressed genes (considered by DESeq2; 12,770). Germinal vesicle (GV); metaphase II (MII); young (YNG); advanced maternal age (AMA). Numbers specify replicate number of the respective sample type.
