# Supplementary material for: Differing molecular response of young and advanced maternal age human oocytes to IVM
Source: Oxford University Press journal article supplement (doi:10.1093/humrep/dex284), 2017-08-22
Supplement: dex284suppl_table2.pdf [file dex284suppl_table2.pdf]

**Supplementary Table SII Paired-end reads mapping human (GRCh38.82) reference genome using CLC workbench.**

|                                                      | Day of library preparation | Total reads | Total aligned | % Aligned-total | Total gene aligned | % Aligned-total gene | Total exon aligned | % Aligned-total exon |
|------------------------------------------------------|----------------------------|-------------|---------------|-----------------|--------------------|----------------------|--------------------|----------------------|
| <b>AMA and young germinal vesicle oocyte samples</b> |                            |             |               |                 |                    |                      |                    |                      |
| AMA GV - 1                                           | 1                          | 4,17,42,578 | 3,73,26,590   | 89.42%          | 3,33,47,581        | 79.89%               | 2,82,97,706        | 67.79%               |
| AMA GV - 2                                           | 1                          | 5,75,55,238 | 5,19,37,653   | 90.24%          | 4,71,86,330        | 81.98%               | 4,07,76,638        | 70.85%               |
| AMA GV - 3                                           | 2                          | 5,29,50,852 | 4,77,21,575   | 90.12%          | 4,29,26,902        | 81.07%               | 3,61,36,807        | 68.25%               |
| AMA GV - 4                                           | 2                          | 5,08,32,378 | 4,65,05,624   | 91.49%          | 4,19,68,497        | 82.56%               | 3,59,77,835        | 70.78%               |
| AMA GV - 5                                           | 3                          | 7,13,15,038 | 6,44,80,761   | 90.42%          | 5,84,29,169        | 81.93%               | 5,05,40,017        | 70.87%               |
| <b>AMA GV Avg.</b>                                   |                            | 5,48,79,217 | 4,95,94,441   | 90.37%          | 4,47,71,696        | 81.49%               | 3,83,45,801        | 69.71%               |
| YNG GV - 1                                           | 3                          | 5,51,13,088 | 4,94,36,344   | 89.70%          | 4,42,94,386        | 80.37%               | 3,79,15,697        | 68.80%               |
| YNG GV - 2                                           | 2                          | 4,72,77,162 | 4,24,29,443   | 89.75%          | 3,82,34,764        | 80.87%               | 3,28,81,264        | 69.55%               |
| YNG GV - 3                                           | 1                          | 5,72,46,446 | 5,30,09,182   | 92.60%          | 4,76,53,172        | 83.24%               | 4,04,80,767        | 70.71%               |
| YNG GV - 4                                           | 1                          | 4,87,81,212 | 4,43,62,937   | 90.94%          | 3,99,46,608        | 81.89%               | 3,41,69,277        | 70.05%               |
| YNG GV - 5                                           | 2                          | 5,95,71,138 | 5,37,69,810   | 90.26%          | 4,89,76,917        | 82.22%               | 4,25,18,761        | 71.37%               |
| <b>YNG GV Avg.</b>                                   |                            | 5,35,97,809 | 4,86,01,543   | 90.68%          | 4,38,21,169        | 81.72%               | 3,75,93,153        | 70.10%               |
| <b>AMA and young metaphase II oocyte samples</b>     |                            |             |               |                 |                    |                      |                    |                      |
| AMA MII - 1                                          | 1                          | 4,96,04,302 | 4,50,23,779   | 90.77%          | 4,11,67,882        | 82.99%               | 3,61,06,340        | 72.79%               |
| AMA MII - 2                                          | 1                          | 6,32,65,120 | 5,69,38,115   | 90.00%          | 5,23,04,233        | 82.67%               | 4,56,48,418        | 72.15%               |
| AMA MII - 3                                          | 2                          | 6,49,10,604 | 5,82,90,367   | 89.80%          | 5,31,59,889        | 81.90%               | 4,53,62,901        | 69.89%               |
| AMA MII - 4                                          | 2                          | 7,23,98,740 | 6,56,66,513   | 90.70%          | 5,99,24,497        | 82.77%               | 5,16,88,542        | 71.39%               |
| AMA MII - 5                                          | 3                          | 5,85,49,970 | 5,32,89,928   | 91.02%          | 4,86,79,948        | 83.14%               | 4,25,32,802        | 72.64%               |
| <b>AMA MII Avg.</b>                                  |                            | 6,17,45,747 | 5,58,41,740   | 90.44%          | 5,10,47,290        | 82.70%               | 4,42,67,801        | 71.77%               |
| YNG MII - 1                                          | 3                          | 6,21,07,664 | 5,62,65,737   | 90.59%          | 5,13,04,758        | 82.61%               | 4,46,04,654        | 71.82%               |
| YNG MII - 2                                          | 2                          | 5,73,26,998 | 5,20,73,000   | 90.84%          | 4,76,86,424        | 83.18%               | 4,13,53,495        | 72.14%               |
| YNG MII - 3                                          | 1                          | 5,15,56,260 | 4,69,25,330   | 91.02%          | 4,28,60,330        | 83.13%               | 3,70,01,419        | 71.77%               |
| YNG MII - 4                                          | 1                          | 6,00,45,336 | 5,49,83,881   | 91.57%          | 5,05,42,528        | 84.17%               | 4,40,68,682        | 73.39%               |
| YNG MII - 5                                          | 2                          | 6,28,84,082 | 5,55,58,306   | 88.35%          | 5,11,86,048        | 81.40%               | 4,47,32,752        | 71.14%               |
| <b>YNG MII Avg.</b>                                  |                            | 5,87,84,068 | 5,31,61,251   | 90.43%          | 4,87,16,018        | 82.90%               | 4,23,52,200        | 72.05%               |

AMA, advanced maternal age; GV, germinal vesicle; MII, metaphase II.

Each read pair counts as two unless only one read of a pair maps in which case it counts as one. AMA (donor age  $\geq 40$ ): AMA, Young (donor age  $< 30$ ): YNG. Total exon reads used in subsequent data analysis.
