# Supplementary material for: Differing molecular response of young and advanced maternal age human oocytes to IVM
Source: Oxford University Press journal article supplement (doi:10.1093/humrep/dex284), 2017-08-22
Supplement: dex284suppl_table3.pdf [file dex284suppl_table3.pdf]

**Supplementary Table SIII Enriched functions within DEGs unique to the YNG GV/YNG MII oocyte comparison.**

| <b>Function</b>              | <b>Gene count</b> | <b>FDR<sup>a</sup></b> | <b>Gene names</b>            |
|------------------------------|-------------------|------------------------|------------------------------|
| Metabolism of UDP-sugar      | 4                 | 4.30E-03               | CSGALNACT1,GALT,SLC35A3,UAPI |
| Esterification of oleic acid | 2                 | 4.13E-02               | APOC1,SOAT1                  |

DEG, differentially expressed gene; GV, germinal vesicle; MII, metaphase II; YNG, young.

DEG enrichment analysis was conducted using IPA.

<sup>a</sup>Benjamini-Hochberg multiple testing correction *P*-value (FDR).
