# Supplementary material for: Differing molecular response of young and advanced maternal age human oocytes to IVM
Source: Oxford University Press journal article supplement (doi:10.1093/humrep/dex284), 2017-08-22
Supplement: dex284suppl_table4.pdf [file dex284suppl_table4.pdf]

**Supplementary Table SIV Enriched canonical pathways within DEGs unique to the AMA GV/AMA MII oocyte comparison.**

| Canonical pathways                        | Gene count | FDR <sup>a</sup> | Gene names                                                                                                                                                                                                                                                 |
|-------------------------------------------|------------|------------------|------------------------------------------------------------------------------------------------------------------------------------------------------------------------------------------------------------------------------------------------------------|
| Breast Cancer Regulation by Stathmin I    | 30         | 2.09E-03         | CAMK4, PPP2R2A, PPP1R3C, HRAS, PPP1CB, PPP1R14B, LIMK1, STMN1, PPM1L, TUBA3C/TUBA3D, PRKAR1B, PRKCE, ARHGEF3, TUBA3E, PRKD3, TP53, GNG4, CCNE2, GRB2, TUBB2A, PPP1R11, PPP2R5A, CDK1, GNAI3, CALM1 (includes others), CDKN1A, ITPR3, PIK3CD, ADCY7, CAMK2G |
| GADD45 Signaling                          | 7          | 2.57E-02         | TP53, PCNA, CCNE2, CCND2, CDKN1A, CDK4, CDK1                                                                                                                                                                                                               |
| Oxidative Phosphorylation                 | 17         | 4.90E-02         | NDUFV1, ATP5G1, COX17, ATP5H, NDUFA7, NDUFS7, NDUFA1, NDUFA2, NDUFB11, NDUFV2, NDUFS8, NDUFB7, NDUFS6, CYCS, CYB5A, ATP5I, ATP5F1                                                                                                                          |
| Synaptic Long Term Potentiation           | 18         | 4.90E-02         | CAMK4, PDIA3, GRM8, PPP1R3C, GRIA1, PPP1CB, HRAS, PPP1R11, PPP1R14B, PLCD3, CALM1 (includes others), PPP3CB, ITPR3, PRKAR1B, PRKCE, ATF4, PRKD3, CAMK2G                                                                                                    |
| Mitochondrial Dysfunction                 | 23         | 4.90E-02         | NDUFV1, ATP5G1, COX17, ATP5H, UCP2, NDUFA7, NDUFS7, NDUFA1, NDUFA2, PDHA1, FIS1, PRDX3, NDUFB11, NDUFS8, NDUFV2, GPD2, NDUFB7, NDUFS6, CYCS, CYB5A, ATP5F1, ATP5I, PINK1                                                                                   |
| Regulation of Actin-based Motility by Rho | 15         | 4.90E-02         | ITGB1, PFN1, MYL6, ARPC5, PIKFYVE, PPP1CB, WASF1, LIMK1, RHOG, ARPC1A, RND3, RHOT1, ARPC3, PIP5K1I, MYL4                                                                                                                                                   |
| Actin Nucleation by ARP-WASP Complex      | 11         | 4.90E-02         | ITGB1, RHOG, ARPC1A, RND3, RHOT1, GRB2, GNAI2, ARPC5, ARPC3, HRAS, WASF1                                                                                                                                                                                   |

AMA, advanced maternal age; DEG, differentially expressed gene; GV, germinal vesicle; MII, metaphase II.

DEG enrichment analysis was conducted using IPA.

<sup>a</sup>Benjamini-Hochberg multiple testing correction P-value (FDR).
