# Supplementary material for: Differing molecular response of young and advanced maternal age human oocytes to IVM
Source: Oxford University Press journal article supplement (doi:10.1093/humrep/dex284), 2017-08-22
Supplement: dex284suppl_table5.pdf [file dex284suppl_table5.pdf]

**Supplementary Table SV Enriched functions within DEGs unique to the AMA GV/AMA MII oocyte comparison.**

| Function        | Gene count | FDR <sup>a</sup> | Gene names                                                                                                                                                                                                                                           |
|-----------------|------------|------------------|------------------------------------------------------------------------------------------------------------------------------------------------------------------------------------------------------------------------------------------------------|
| DNA replication | 38         | 4.22E-02         | ABCB7, ATF1, CACYBP, CAMK2G, CAMK4, CCNA2, CCNE2, CDKI, CDKN1A, CDT1, DUT, E4F1, ESRRA, HRAS, HUS1, HUWE1, ID1, IGF1R, ING4, LHX6, LIG3, NAP1L1, NCOA4, NT5M, ORC2, PCNA, POLD2, POLM, RBL2, RPA3, SDC2, TFAM, TIPIN, TP53, TRRAP, UBA5, UPF1, VPRBP |

AMA, advanced maternal age; DEG, differentially expressed gene; GV, germinal vesicle; MII, metaphase II.

DEG enrichment analysis was conducted using IPA.

<sup>a</sup>Benjamini-Hochberg multiple testing correction *P*-value (FDR).
