# Supplementary material for: Differing molecular response of young and advanced maternal age human oocytes to IVM
Source: Oxford University Press journal article supplement (doi:10.1093/humrep/dex284), 2017-08-22
Supplement: dex284suppl_table6.pdf [file dex284suppl_table6.pdf]

**Supplementary Table SVI Oocyte enriched canonical pathways within genes belonging to modules significantly associated with patient traits.**

| Module color (total genes)<br>Trait (correlation, P-value) <sup>a</sup> | Canonical pathway                                          | Gene<br>count | FDR <sup>b</sup> | Genes                                                                                                                                                                                                                                                                                                                                                                                                |
|-------------------------------------------------------------------------|------------------------------------------------------------|---------------|------------------|------------------------------------------------------------------------------------------------------------------------------------------------------------------------------------------------------------------------------------------------------------------------------------------------------------------------------------------------------------------------------------------------------|
| Germinal vesicle oocytes                                                |                                                            |               |                  |                                                                                                                                                                                                                                                                                                                                                                                                      |
| Sky blue (70) age (0.66, 0.04)                                          | Superpathway of Inositol Phosphate Compounds               | 4             | 1.55E-02         | ACPI, IGBP1, MTMR7, STYXL1                                                                                                                                                                                                                                                                                                                                                                           |
| Metaphase II oocytes                                                    |                                                            |               |                  |                                                                                                                                                                                                                                                                                                                                                                                                      |
| Green (682) good quality blastocyst% (-0.72, 0.02)                      | Glucocorticoid Receptor Signaling                          | 22            | 2.14E-03         | AKT1, BRD7, EP300, FOS, GTF2F2, GTF2H4, HMGB1, KRT36, MAP2K1, NFATC3, PIK3R2, POLR2H, POU2F2, PPP3CC, SMAD2, SMAD4, SMARCA4, STAT3, SUMO1, TAF3, TAF5, TAF6                                                                                                                                                                                                                                          |
|                                                                         | Role of PKR in Interferon Induction and Antiviral Response | 8             | 2.14E-03         | AKT1, BID, EIF2S1, IFNB1, MAP2K3, MAP2K6, TAB2, TP53                                                                                                                                                                                                                                                                                                                                                 |
|                                                                         | Hereditary Breast Cancer Signaling                         | 13            | 7.59E-03         | AKT1, BARD1, BRD7, E2F1, EP300, FAAP24, HDAC6, PALB2, PIK3R2, POLR2H, RPA1, SMARCA4, TP53                                                                                                                                                                                                                                                                                                            |
|                                                                         | TGF-β Signaling                                            | 10            | 1.35E-02         | ACVR1B, ACVR2B, BMPRIA, EP300, FOS, MAP2K1, MAP2K3, MAP2K6, SMAD2, SMAD4                                                                                                                                                                                                                                                                                                                             |
|                                                                         | Role of BRCA1 in DNA Damage Response                       | 9             | 1.91E-02         | BARD1, BRD7, E2F1, FAAP24, MDC1, RBBP8, RPA1, SMARCA4, TP53                                                                                                                                                                                                                                                                                                                                          |
|                                                                         | ERK5 Signaling                                             | 8             | 1.91E-02         | AKT1, ELK4, EP300, FOS, GNAQ, PTPN11, RPS6KA6, WNK1                                                                                                                                                                                                                                                                                                                                                  |
|                                                                         | B Cell Receptor Signaling                                  | 14            | 1.91E-02         | AKT1, EP300, GSK3A, MAP2K1, MAP2K3, MAP2K6, MAP3K9, MAP3K13, NFATC3, PAG1, PIK3R2, POU2F2, PPP3CC, PTPN11                                                                                                                                                                                                                                                                                            |
|                                                                         | Neurotrophin/TRK Signaling                                 | 8             | 2.24E-02         | AKT1, EP300, FOS, MAP2K1, MAP2K3, MAP2K6, PIK3R2, PTPN11                                                                                                                                                                                                                                                                                                                                             |
|                                                                         | CD27 Signaling in Lymphocytes                              | 7             | 2.24E-02         | BID, FOS, MAP2K1, MAP2K3, MAP2K6, MAP3K9, MAP3K13                                                                                                                                                                                                                                                                                                                                                    |
|                                                                         | RANK Signaling in Osteoclasts                              | 9             | 2.75E-02         | AKT1, FOS, MAP2K1, MAP2K6, MAP3K9, MAP3K13, PIK3R2, PPP3CC, TAB2                                                                                                                                                                                                                                                                                                                                     |
|                                                                         | Mouse Embryonic Stem Cell Pluripotency                     | 9             | 4.27E-02         | AKT1, BMPRIA, DVL2, MAP2K1, PIK3R2, PTPN11, SMAD4, STAT3, TP53                                                                                                                                                                                                                                                                                                                                       |
| Turquoise (2, 604) good quality blastocyst% (0.76, 0.01)                | Mitochondrial Dysfunction                                  | 52            | 2.45E-10         | ACO1, ACO2, AIFM1, ATP5A1, ATP5B, ATP5E, ATP5F1, ATP5G1, ATP5H, ATP5I, ATP5L, ATP5O, ATP5S, ATPAF1, ATPAF2, CASP3, COX10, COX17, COX7B, CPT1C, CYB5R3, FIS1, HSD17B10, MAPK10, NDUFA1, NDUFA2, NDUFA3, NDUFA7, NDUFA8, NDUFA9, NDUFA10, NDUFA12, NDUFAF2, NDUFB3, NDUFB7, NDUFS2, NDUFS5, NDUFS6, NDUFS7, NDUFS8, NDUFV1, NDUFV2, PARK7, PDHA1, PINK1, PSEN1, PSEN2, SDHA, SOD2, UCP2, UQCRC1, VDAC3 |
|                                                                         | Oxidative Phosphorylation                                  | 34            | 6.31E-07         | ATP5A1, ATP5B, ATP5E, ATP5F1, ATP5G1, ATP5H, ATP5I, ATP5L, ATP5O, ATP5S, ATPAF1, ATPAF2, COX10, COX17, COX7B, NDUFA1, NDUFA2, NDUFA3, NDUFA7, NDUFA8, NDUFA9, NDUFA10, NDUFA12, NDUFB3, NDUFB7, NDUFS2, NDUFS5, NDUFS6, NDUFS7, NDUFS8, NDUFV1, NDUFV2, SDHA, UQCRC1                                                                                                                                 |
|                                                                         | tRNA Charging                                              | 16            | 1.17E-04         | AARS, CARS, DARS2, FARS2, HARS, LARS, LARS2, MARS, NARS, PARS2, RARS, SARS, TARS, TARS2, VARS, WARS                                                                                                                                                                                                                                                                                                  |
|                                                                         | phagosome maturation                                       | 29            | 1.55E-03         | ATP6V0A1, ATP6V0D1, ATP6V0E1, ATP6V0E2, ATP6V1A, ATP6V1B2, ATP6V1C1, ATP6V1D, ATP6V1E1, ATP6V1G1, ATP6V1H, DYNCL12, DYNCL1L1, DYNLL1, DYNLRB1, DYNLT1, M6PR, NSF, PIK3C3, RAB5B, RAB7A, TUBA1A, TUBA1B, TUBA1C, TUBA4A, VPS39, VPS41, VPS33B, VTIIA                                                                                                                                                  |
|                                                                         | Cell Cycle Control of Chromosomal Replication              | 11            | 4.37E-03         | CDK2, CDK5, MCM3, MCM4, MCM5, MCM6, MCM7, ORC2, ORC4, ORC5, RPA2                                                                                                                                                                                                                                                                                                                                     |

Continued

**Supplementary Table SVI** *Continued*

| Module color (total genes)<br>Trait (correlation, P-value) <sup>a</sup> | Canonical pathway                                          | Gene<br>count | FDR <sup>b</sup> | Genes                                                                                                                                                                                                            |
|-------------------------------------------------------------------------|------------------------------------------------------------|---------------|------------------|------------------------------------------------------------------------------------------------------------------------------------------------------------------------------------------------------------------|
|                                                                         | N-acetylglucosamine Degradation II                         | 4             | 1.02E-02         | AMDHD2, GNPDA1, GNPDA2, NAGK                                                                                                                                                                                     |
|                                                                         | Nucleotide Excision Repair Pathway                         | 12            | 1.02E-02         | CCNH, ERCC1, ERCC3, GTF2H1, GTF2H5, MNAT1, POLR2B, POLR2E, POLR2I, POLR2J, POLR2L, RPA2                                                                                                                          |
|                                                                         | Acetyl-CoA Biosynthesis I (Pyruvate Dehydrogenase Complex) | 5             | 1.38E-02         | DBT, DLAT, DLD, PDHA1, PDHB                                                                                                                                                                                      |
|                                                                         | Valine Degradation I                                       | 8             | 1.38E-02         | ABAT, BCKDHA, DBT, DLD, ECHS1, HADHB, HIBADH, HIBCH                                                                                                                                                              |
|                                                                         | Assembly of RNA Polymerase II Complex                      | 14            | 2.29E-02         | CCNH, ERCC3, GTF2E1, GTF2E2, GTF2H1, GTF2H5, MNAT1, POLR2B, POLR2E, POLR2I, POLR2J, POLR2L, TAF9, TAF9B                                                                                                          |
|                                                                         | CDP-diacylglycerol Biosynthesis I                          | 7             | 3.16E-02         | ABHD5, AGPAT2, AGPAT3, CDS2, GPAT3, GPAT4, LPCAT4                                                                                                                                                                |
|                                                                         | Germ Cell-Sertoli Cell Junction Signaling                  | 30            | 4.37E-02         | ACTG2, CDC42, CDH1, CDH2, CFL1, CFL2, CTNND1, DIRAS3, EPN1, GSN, ITGA3, JUP, LIMK1, LIMK2, MAP3K2, MAP3K7, MAPK10, MTMR2, PAK1, PIK3C3, PIK3CD, PIK3R4, PLS1, RHOC, RHOG, SORBS1, TUBA1A, TUBA1B, TUBA1C, TUBA4A |
| Red (582) fertilization% (-0.68, 0.03)                                  | Tight Junction Signaling                                   | 14            | 1.17E-02         | CLDN6, CSTF3, CTNNA1, EPB41, GOSR2, MYH7, MYL4, NAPG, NUDT21, OCLN, PPP2CB, PRKARIA, SAFB, YKT6                                                                                                                  |

Canonical pathway enrichment analysis was conducted using IPA.

Gene modules within the respective stages contain unique genes.

<sup>a</sup>Physical traits significantly ( $P < 0.05$ ) correlated with respective gene modules.

<sup>b</sup>Benjamini-Hochberg multiple testing correction P-value (FDR).
